# Supplementary material for: Type I IFN signature in childhood-onset systemic lupus erythematosus: a conspiracy of DNA- and RNA-sensing receptors?
Source: Springer Nature journal article supplement (doi:10.1186/s13075-017-1501-z), 2018-01-10
Supplement: MOESM1 [file 15356218]

## Additional file 1: Correlations of RLR and DBR expression levels with IFN scores

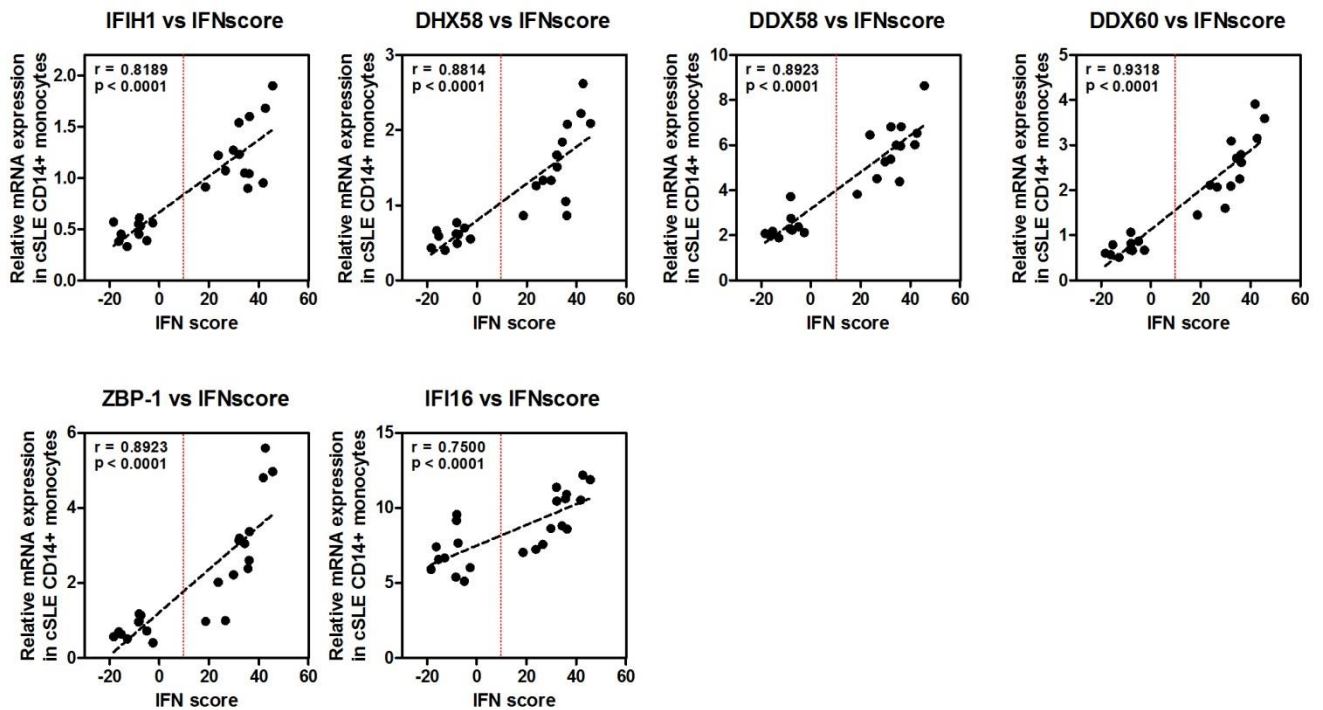

**Additional figure S1:** Correlation between interferon (IFN) type I score and mRNA expression of 6 IFN inducible genes (IFIH1, DDX58, DDX60, DHX58, ZBP-1, IFI16) in CD14+ monocytes in patients with cSLE (n=23). The correlation coefficients ( $r$ ) and  $p$  values are shown. For correlations Spearman's  $\rho$  correlation test was used and to compare means the Mann–Whitney U test was used.
