# Supplementary material for: Type I IFN signature in childhood-onset systemic lupus erythematosus: a conspiracy of DNA- and RNA-sensing receptors?
Source: Springer Nature journal article supplement (doi:10.1186/s13075-017-1501-z), 2018-01-10
Supplement: MOESM2 [file 15356218]

## Additional file 2: Gating strategy and representative histogram

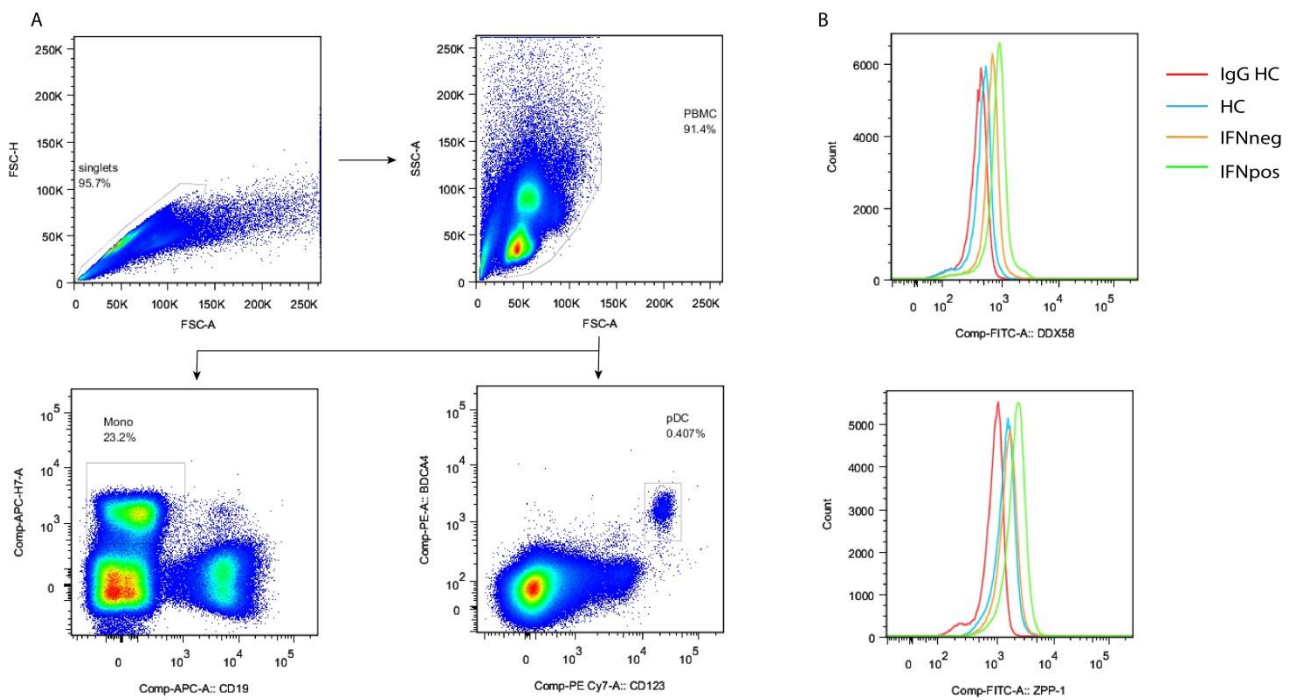

**Additional figure S2: A)** Gating strategy for CD14<sup>+</sup> monocytes and CD123/BDC4<sup>+</sup> pDCs. PBMCs were gated after removal of doublets and dead cells. Within the PBMC fraction, CD14<sup>+</sup> monocytes were gated and CD123/BDC4<sup>+</sup> pDCs **B)** representative histogram of protein expression levels (top: DDX58/RIG-I, bottom: ZBP-1).
