# Supplementary material for: Type I IFN signature in childhood-onset systemic lupus erythematosus: a conspiracy of DNA- and RNA-sensing receptors?
Source: Springer Nature journal article supplement (doi:10.1186/s13075-017-1501-z), 2018-01-10
Supplement: MOESM3 [file 15356218]

### Additional file 3: RLR and DBR protein expression in pDC of cSLE patients

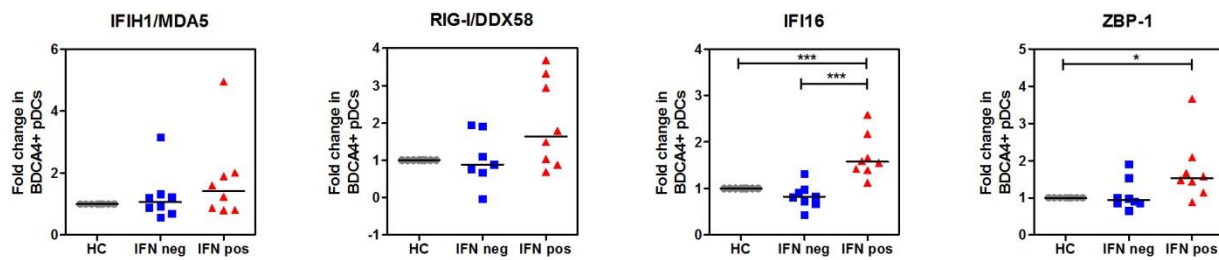

**Additional figure S3:** Flowcytometric analysis of MDA5, RIG-I, IFI16 and ZBP-1 in pDCs of IFNpos cSLE patients (n=8), IFNneg cSLE patients (n=8) and healthy controls (n=8). Each symbol represents an individual sample. To compare the three groups One-way ANOVA was used. Data represented in fold change compared to HC. \* $p < 0.05$ ; \*\* $p < 0.01$ ; \*\*\* $p < 0.001$ ; \*\*\*\* $p < 0.0001$ .
