# Supplementary material for: Type I IFN signature in childhood-onset systemic lupus erythematosus: a conspiracy of DNA- and RNA-sensing receptors?
Source: Springer Nature journal article supplement (doi:10.1186/s13075-017-1501-z), 2018-01-10
Supplement: MOESM4 [file 15356218]

**Additional file 4: Titration curve of BX795**

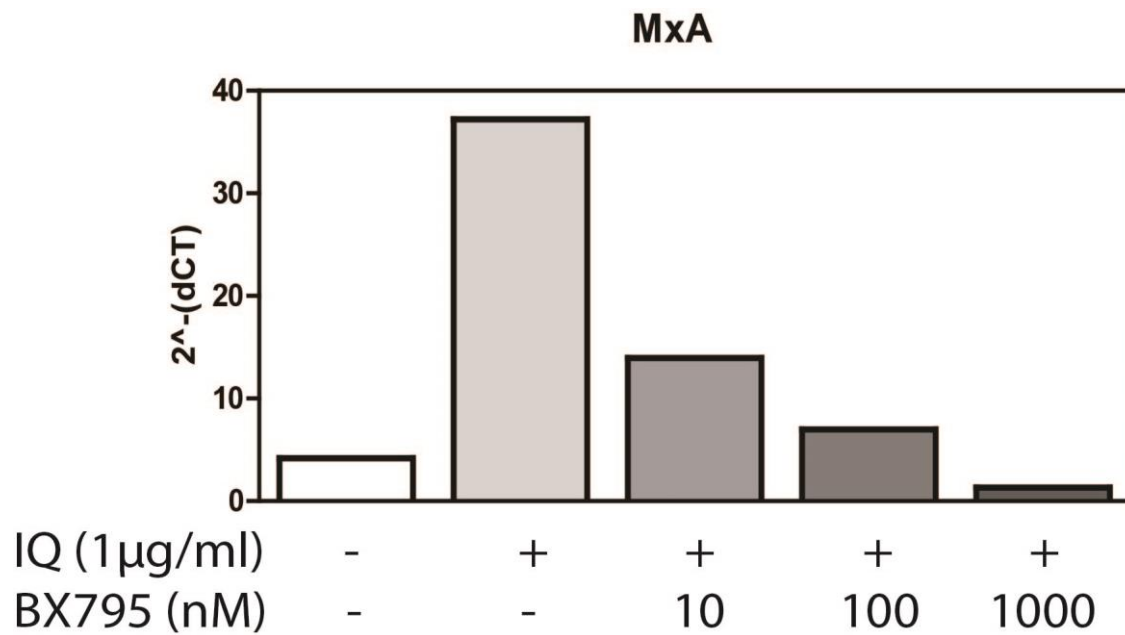

**Additional figure S4:** Titration of BX795 on HC PBMCs. Relative MxA gene expression after 5 hr culturing of PBMCs of HCs with imiquimod (IQ) (1 μg/ml) and increasing amounts of TBK1/IKKε inhibitor (BX795)(10, 100 and 1000 nM). Gene expression data are presented as means ± SEM.
