# Supplementary material for: Type I IFN signature in childhood-onset systemic lupus erythematosus: a conspiracy of DNA- and RNA-sensing receptors?
Source: Springer Nature journal article supplement (doi:10.1186/s13075-017-1501-z), 2018-01-10
Supplement: MOESM5 [file 15356218]

**Additional file 5: Effectivity of inhibitors for TBK1, TLR7 and TLR7+9 to downregulate Imiquimod induced MxA expression.**

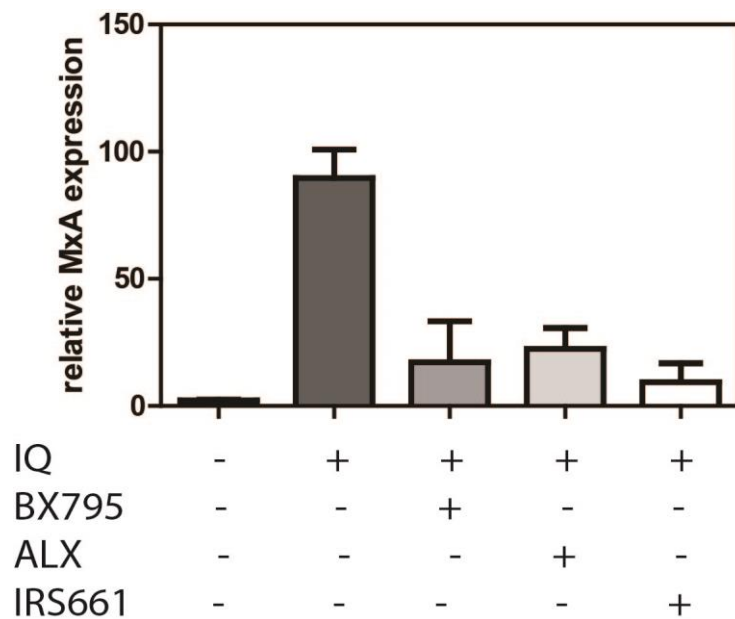

**Additional figure S5** Relative MxA gene expression after 5 hr culturing of PBMCs of HCs with imiquimod (IQ) (1 µg/ml)) and/or incubated with TBK1/IKKε inhibitor (BX795)(1 µM), TLR 7 and 9 inhibitor (ALX-746-255) (2 µM) or TLR 7 inhibitor (IRS661) )(5 µM). Cells without addition of stimuli or inhibitors are cultured in starvation medium and used as control for baseline IFN activation level. Gene expression data are presented as means ± SEM of 2 independent experiments.
